# Supplementary material
Source: publisher site journal article supplement (https://www.dovepress.com/article/230895)

**Supplementary figure 1. The effect of LINC01140 and miR-199a-3p on tumor volume and weight.** A). Tumor volume under transfections of shNC, shLINC01140, or shLINC01140+miR-190a-3p inhibitor; B). Tumor weight under transfections of shNC, shLINC01140, or shLINC01140+miR-190a-3p inhibitor.


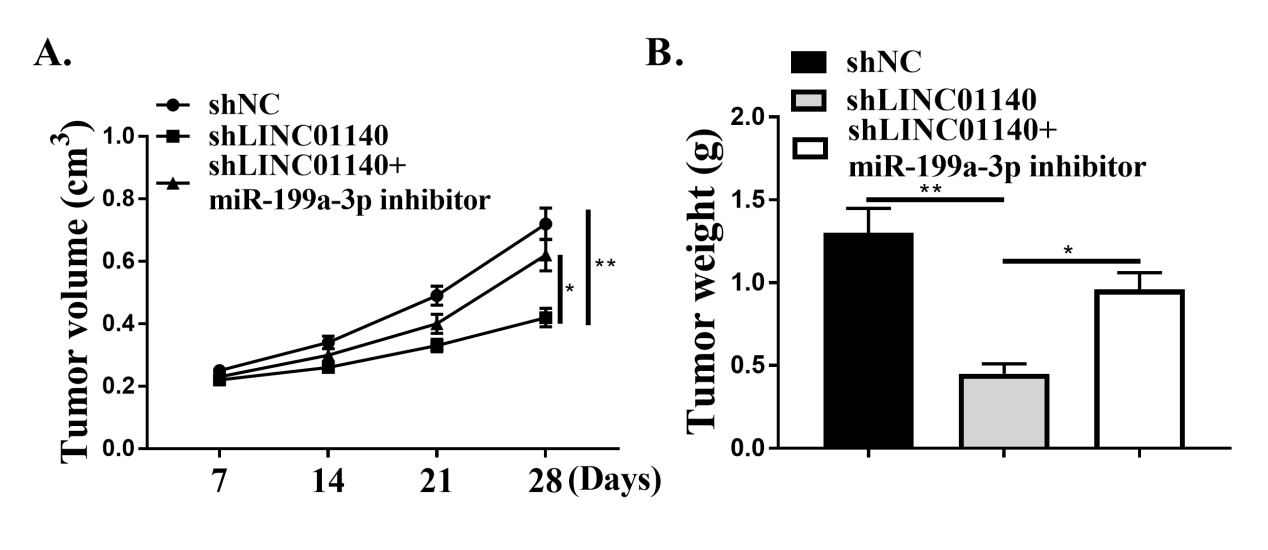

Supplement: Supplementary file 1 [file get_supplementary_file.php]
